# Supplementary material for: Oxidative stress-induced EGR1 upregulation promotes NR4A3-mediated nucleus pulposus cells apoptosis in intervertebral disc degeneration
Source: publisher site journal article supplement (doi:10.18632/aging.205920), 2024-06-28
Supplement: Supplementary file [file aging-v16-205920-supplementary-material-SD1.pdf]

## SUPPLEMENTARY FIGURES

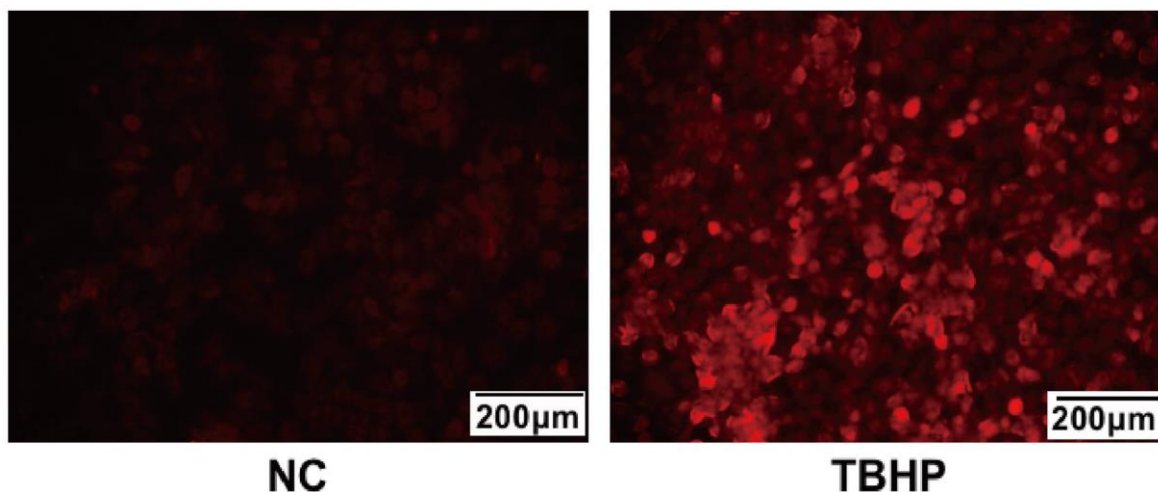

**Supplementary Figure 1. Reactive oxygen species levels in NPCs.** The control group consisted of normal NPCs, while the experimental group consisted of NPCs induced with TBHP (50  $\mu$ M, 24 h). The difference in reactive oxygen species levels between the two groups was compared under a fluorescence microscope.

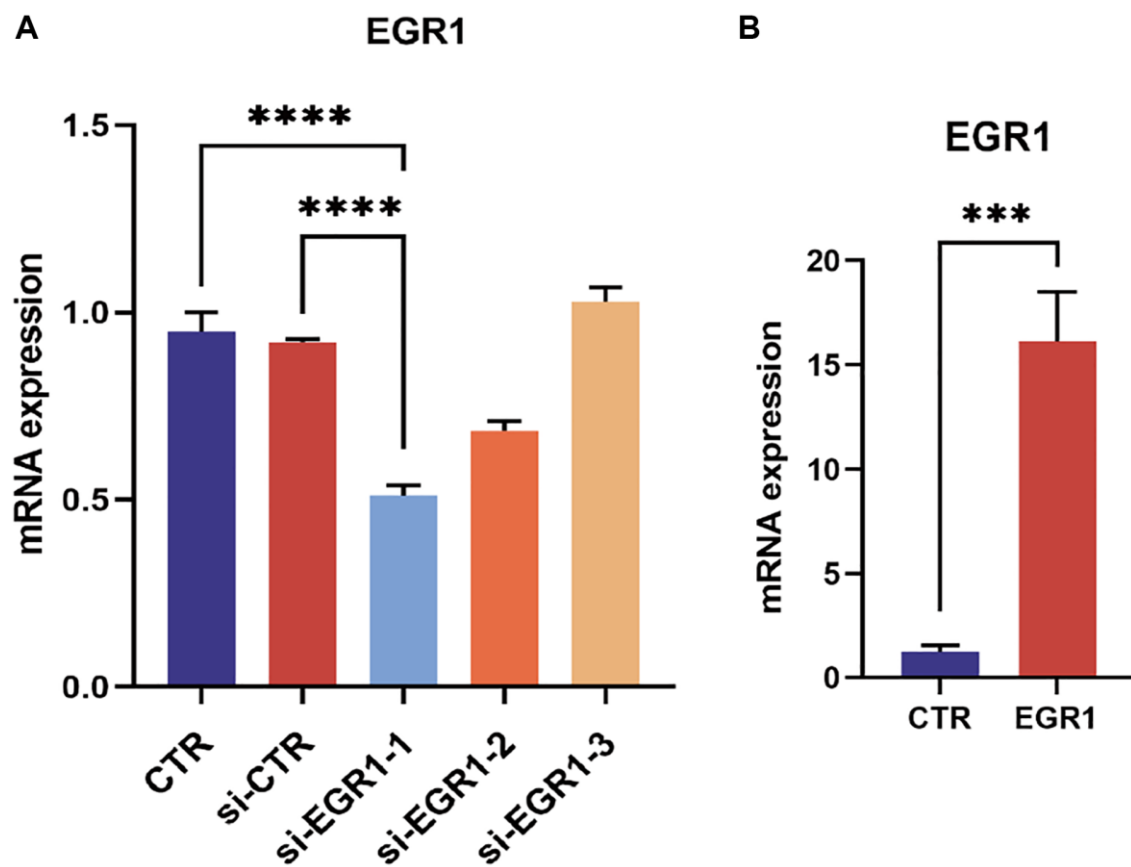

**Supplementary Figure 2. Efficiency of EGR1 knockdown and overexpression.** (A) mRNA levels in NPCs after transfection with different EGR1 siRNAs. (B) mRNA levels in NPCs after transient transfection with plasmids overexpressing EGR1. The data are expressed as the mean  $\pm$  SD ( $n = 3$ ). \*\*\* $p < 0.001$ , \*\*\*\* $p < 0.0001$ .

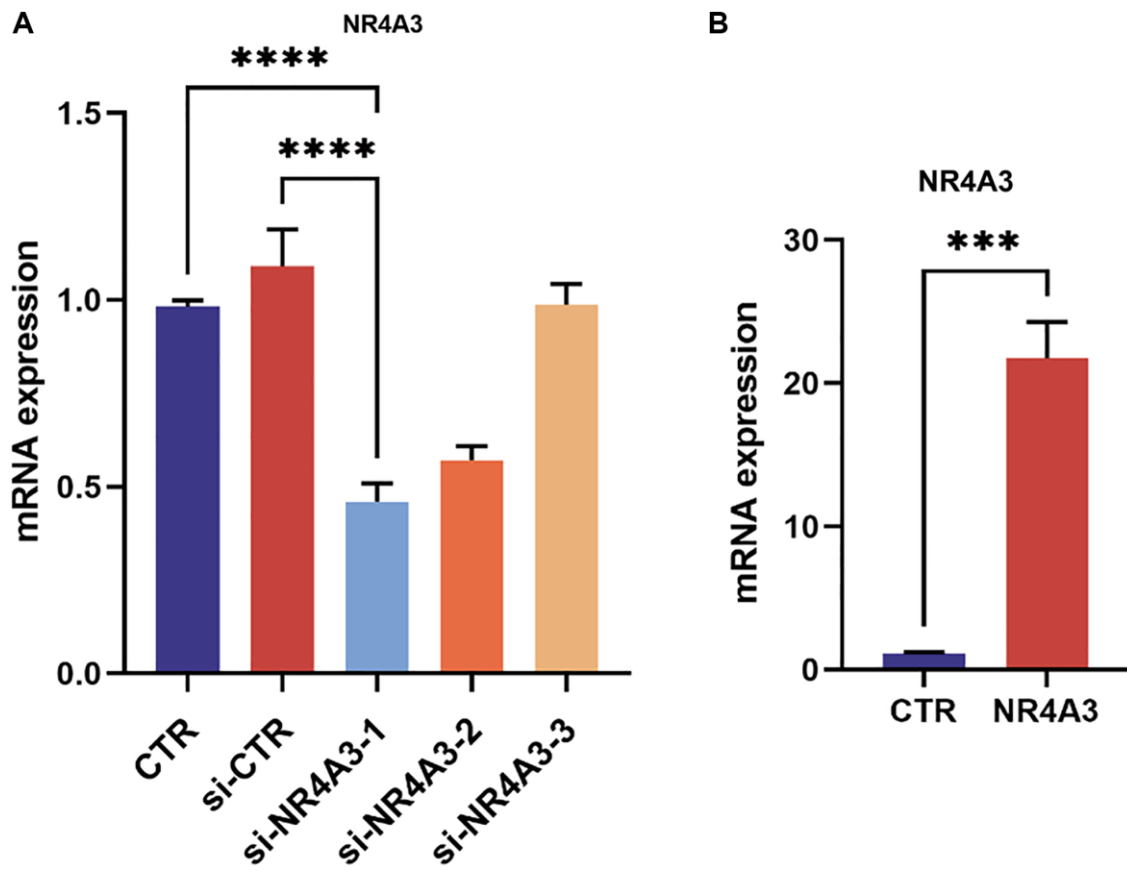

**Supplementary Figure 3. Efficiency of NR4A3 knockdown and overexpression.** (A) mRNA levels in NPCs after transfection with different NR4A3 siRNAs. (B) mRNA levels in NPCs after transient transfection with plasmids overexpressing NR4A3. The data are expressed as the mean  $\pm$  SD ( $n = 3$ ). \*\*\* $p < 0.001$ , \*\*\*\* $p < 0.0001$ .
