# Supplementary material for: Oxidative stress-induced EGR1 upregulation promotes NR4A3-mediated nucleus pulposus cells apoptosis in intervertebral disc degeneration
Source: publisher site journal article supplement (doi:10.18632/aging.205920), 2024-06-28
Supplement: Supplementary file [file aging-v16i12-205920-supplementary-material-SD2.pdf]

## SUPPLEMENTARY TABLES

**Supplementary Table 1. Information on human disc samples from 10 patients.**

| <b>Samples</b> | <b>Diagnosis</b>          | <b>Sex</b> | <b>Age</b> | <b>BMI</b> | <b>Level</b> | <b>Grade</b> |
|----------------|---------------------------|------------|------------|------------|--------------|--------------|
| 1              | Acute disc herniation     | M          | 19y        | 23.7       | L4/L5        | II           |
| 2              | Acute disc herniation     | M          | 18y        | 24.1       | L4/L5        | I            |
| 3              | Acute disc herniation     | M          | 28y        | 25.3       | L4/L5        | II           |
| 4              | Spinal fractures          | F          | 33y        | 20.7       | T12/L1       | I            |
| 5              | Acute disc herniation     | F          | 16y        | 23.5       | L5/S1        | I            |
| 6              | Degenerative disc disease | F          | 51y        | 27.5       | L5/S1        | III          |
| 7              | Degenerative disc disease | F          | 80y        | 22.1       | L4/L5        | V            |
| 8              | Degenerative disc disease | M          | 66y        | 26.4       | L4/L5        | V            |
| 9              | Degenerative disc disease | M          | 67y        | 18.4       | L4/L5        | V            |
| 10             | Degenerative disc disease | M          | 62y        | 26.2       | L5/S1        | IV           |

Abbreviations: M: male; F: female, y: year.

**Supplementary Table 2. Primer sequence for ChIP-qPCR.**

| <b>Site</b> | <b>Gene</b>   | <b>Primer sequence</b>   |
|-------------|---------------|--------------------------|
| Site 1      | NR4A3-ChIP-F1 | GAATCTCAGTCTTCCCTTTCTGTC |
|             | NR4A3-ChIP-R1 | TGGGCAGACGAAAGGAACAC     |
| Site 2      | NR4A3-ChIP-F2 | GAGGAAAGGCTGTGTGGGTC     |
|             | NR4A3-ChIP-R2 | GCATTCCCTGAGGGCCTTTC     |
| Site 3      | NR4A3-ChIP-F3 | TGGGAAGATCCGCTTCTACC     |
|             | NR4A3-ChIP-R3 | GAGAAAGGGACTCGGGGCTC     |
